# Supplementary material
Source: HighWire-hosted journal article supplement (https://www.annfammed.org/highwire/filestream/14174/field_highwire_adjunct_files/0/Turner.pdf)
Supplement: Turner.pdf [file Turner.pdf]

## Supplemental Materials for

Turner CD, Lindsay R, Heisler M. Peer Coaching to improve diabetes self-management among low-income black veteran men: a mixed methods assessment of enrollment and engagement. *Ann Fam Med*. 2021;19(6):532-539.

## Supplemental Appendix: Qualitative Interview Questions

How well did you feel you connected to your Coach?

What was your experience like working with your Coach after that first session? How, if at all, was it different than what you were initially expecting?

How did you feel about how your Coach talked with you?

How did working with the Coach compare with working with your health care providers who you see for your diabetes?
